# Supplementary material for: Validity and Reliability of the COVID-19 Knowledge, Attitude and Behavior Scale
Source: MDPI journal article supplement (doi:10.3390/vaccines11020317), 2023-01-31
Supplement: s1 [file s1]

**Supplementary File S1. CKAPS Draft.**

| <b>Question</b> | <b>COVID 19 Knowledge-Attitude</b>                                                                                                    | <b>Disagree</b>            | <b>Partly agree</b>        | <b>Totally agree</b>       |
|-----------------|---------------------------------------------------------------------------------------------------------------------------------------|----------------------------|----------------------------|----------------------------|
| <b>K1</b>       | COVID-19 disease transmitted by droplets in the coughs of patients.                                                                   | 1 <input type="checkbox"/> | 2 <input type="checkbox"/> | 3 <input type="checkbox"/> |
| <b>K2</b>       | COVID-19 is more severe in the elderly and those with chronic diseases.                                                               | 1 <input type="checkbox"/> | 2 <input type="checkbox"/> | 3 <input type="checkbox"/> |
| <b>K3</b>       | The most common symptoms of COVID-19 disease are fever, cough and respiratory distress.                                               | 1 <input type="checkbox"/> | 2 <input type="checkbox"/> | 3 <input type="checkbox"/> |
| <b>K4</b>       | There are methods that fully treat the COVID-19 disease.                                                                              | 1 <input type="checkbox"/> | 2 <input type="checkbox"/> | 3 <input type="checkbox"/> |
| <b>K5</b>       | Mask should be worn to protect from COVID-19 disease.                                                                                 | 1 <input type="checkbox"/> | 2 <input type="checkbox"/> | 3 <input type="checkbox"/> |
| <b>K6</b>       | Hands should be washed with soap and water to protect from the virus.                                                                 | 1 <input type="checkbox"/> | 2 <input type="checkbox"/> | 3 <input type="checkbox"/> |
| <b>K7</b>       | In the absence of water and soap, alcohol-containing disinfectant or cologne should be used.                                          | 1 <input type="checkbox"/> | 2 <input type="checkbox"/> | 3 <input type="checkbox"/> |
| <b>K8</b>       | Contact of contaminated hands with eyes, mouth and nose may cause disease.                                                            | 1 <input type="checkbox"/> | 2 <input type="checkbox"/> | 3 <input type="checkbox"/> |
| <b>K9</b>       | Everyone who comes together to protect from disease must wear a mask.                                                                 | 1 <input type="checkbox"/> | 2 <input type="checkbox"/> | 3 <input type="checkbox"/> |
| <b>K10</b>      | COVID-19 is not transmitted in areas with hot and humid climates.                                                                     | 1 <input type="checkbox"/> | 2 <input type="checkbox"/> | 3 <input type="checkbox"/> |
| <b>K11</b>      | As social distancing decreases, the risk of transmission of COVID-19 disease increases.                                               | 1 <input type="checkbox"/> | 2 <input type="checkbox"/> | 3 <input type="checkbox"/> |
| <b>K12</b>      | Those who have the flu vaccine are protected from COVID-19 disease.                                                                   | 1 <input type="checkbox"/> | 2 <input type="checkbox"/> | 3 <input type="checkbox"/> |
| <b>K13</b>      | Washing the nose regularly with salty water protects the person from COVID-19 disease.                                                | 1 <input type="checkbox"/> | 2 <input type="checkbox"/> | 3 <input type="checkbox"/> |
| <b>K14</b>      | Those who wear medical mask may come into close contact with people.                                                                  | 1 <input type="checkbox"/> | 2 <input type="checkbox"/> | 3 <input type="checkbox"/> |
| <b>K15</b>      | The mask only needs to cover the mouth.                                                                                               | 1 <input type="checkbox"/> | 2 <input type="checkbox"/> | 3 <input type="checkbox"/> |
| <b>K16</b>      | Diluted sodium hypochlorite should be used for cleaning and disinfection of floors and surfaces.                                      | 1 <input type="checkbox"/> | 2 <input type="checkbox"/> | 3 <input type="checkbox"/> |
| <b>K17</b>      | Those who have the pneumonia vaccine are protected from COVID-19 disease.                                                             | 1 <input type="checkbox"/> | 2 <input type="checkbox"/> | 3 <input type="checkbox"/> |
| <b>K18</b>      | Distance, hygiene and mask wearing rules should be followed among employees in order to protect themselves from disease in workplace. | 1 <input type="checkbox"/> | 2 <input type="checkbox"/> | 3 <input type="checkbox"/> |
| <b>K19</b>      | Natural ventilation should be preferred in homes and workplaces.                                                                      | 1 <input type="checkbox"/> | 2 <input type="checkbox"/> | 3 <input type="checkbox"/> |
| <b>K20</b>      | The use of vinegar is effective in preventing COVID-19 disease.                                                                       | 1 <input type="checkbox"/> | 2 <input type="checkbox"/> | 3 <input type="checkbox"/> |
| <b>K21</b>      | It is not necessary to wear a mask if there are a few people on public transport vehicles.                                            | 1 <input type="checkbox"/> | 2 <input type="checkbox"/> | 3 <input type="checkbox"/> |
| <b>K22</b>      | Mask should be worn at home while in quarantine.                                                                                      | 1 <input type="checkbox"/> | 2 <input type="checkbox"/> | 3 <input type="checkbox"/> |
| <b>K23</b>      | Plants such as garlic and linden should be used to prevent COVID-19 disease.                                                          | 1 <input type="checkbox"/> | 2 <input type="checkbox"/> | 3 <input type="checkbox"/> |
| <b>K24</b>      | Used materials should not be reused after being removed.                                                                              | 1 <input type="checkbox"/> | 2 <input type="checkbox"/> | 3 <input type="checkbox"/> |
| <b>K25</b>      | In case of fever, cough and shortness of breath, should go to the hospital immediately.                                               | 1 <input type="checkbox"/> | 2 <input type="checkbox"/> | 3 <input type="checkbox"/> |
| <b>K26</b>      | The mask should be changed when it becomes damp or soiled.                                                                            | 1 <input type="checkbox"/> | 2 <input type="checkbox"/> | 3 <input type="checkbox"/> |

| Question | COVID 19 Knowledge-Attitude                                                                                                 | Disagree                   | Partly agree               | Totally agree              |
|----------|-----------------------------------------------------------------------------------------------------------------------------|----------------------------|----------------------------|----------------------------|
| K27      | Unnecessary and excessive use of disinfectants should be avoided.                                                           | 1 <input type="checkbox"/> | 2 <input type="checkbox"/> | 3 <input type="checkbox"/> |
| A1       | When a vaccine for COVID-19 disease is developed, I get it.                                                                 | 1 <input type="checkbox"/> | 2 <input type="checkbox"/> | 3 <input type="checkbox"/> |
| A2       | Wearing gloves protects me from disease.                                                                                    | 1 <input type="checkbox"/> | 2 <input type="checkbox"/> | 3 <input type="checkbox"/> |
| A3       | If I wear a mask outside, I won't get sick.                                                                                 | 1 <input type="checkbox"/> | 2 <input type="checkbox"/> | 3 <input type="checkbox"/> |
| A4       | COVID-19 is not easily transmitted to me.                                                                                   | 1 <input type="checkbox"/> | 2 <input type="checkbox"/> | 3 <input type="checkbox"/> |
| A5       | There is an unnecessary sensitivity in the society regarding COVID-19.                                                      | 1 <input type="checkbox"/> | 2 <input type="checkbox"/> | 3 <input type="checkbox"/> |
| A6       | COVID-19 is not that deadly disease in my opinion.                                                                          | 1 <input type="checkbox"/> | 2 <input type="checkbox"/> | 3 <input type="checkbox"/> |
| A7       | Even if I get COVID-19, I'll get over it easily.                                                                            | 1 <input type="checkbox"/> | 2 <input type="checkbox"/> | 3 <input type="checkbox"/> |
| A8       | I think my body resistance to COVID-19 disease is quite high.                                                               | 1 <input type="checkbox"/> | 2 <input type="checkbox"/> | 3 <input type="checkbox"/> |
| A9       | I do not believe that COVID-19 disease is transmitted by the scattering of droplets in the inhaled air.                     | 1 <input type="checkbox"/> | 2 <input type="checkbox"/> | 3 <input type="checkbox"/> |
| A10      | I do not believe that COVID-19 is transmitted by those who have had the disease asymptotically.                             | 1 <input type="checkbox"/> | 2 <input type="checkbox"/> | 3 <input type="checkbox"/> |
| A11      | I do not believe that wearing a mask protects people from COVID-19 disease.                                                 | 1 <input type="checkbox"/> | 2 <input type="checkbox"/> | 3 <input type="checkbox"/> |
| A12      | I don't think it is necessary to wash hands with soap and water to protect from COVID-19 disease.                           | 1 <input type="checkbox"/> | 2 <input type="checkbox"/> | 3 <input type="checkbox"/> |
| A13      | I think it is unnecessary to make a special effort to avoid getting COVID-19 disease.                                       | 1 <input type="checkbox"/> | 2 <input type="checkbox"/> | 3 <input type="checkbox"/> |
| A14      | Social distancing doesn't matter to me in COVID-19 disease.                                                                 | 1 <input type="checkbox"/> | 2 <input type="checkbox"/> | 3 <input type="checkbox"/> |
| A15      | I think that the COVID-19 disease will infect everyone.                                                                     | 1 <input type="checkbox"/> | 2 <input type="checkbox"/> | 3 <input type="checkbox"/> |
| A16      | Only the elderly and chronic patients should be protected in the community for COVID-19 disease.                            | 1 <input type="checkbox"/> | 2 <input type="checkbox"/> | 3 <input type="checkbox"/> |
| A17      | Only sick people to wear mask is enough.                                                                                    | 1 <input type="checkbox"/> | 2 <input type="checkbox"/> | 3 <input type="checkbox"/> |
| A18      | Being in the same environment with COVID-19 patients is enough to catch the disease.                                        | 1 <input type="checkbox"/> | 2 <input type="checkbox"/> | 3 <input type="checkbox"/> |
| A19      | I think it is important to wear disposable gloves to avoid contracting COVID-19.                                            | 1 <input type="checkbox"/> | 2 <input type="checkbox"/> | 3 <input type="checkbox"/> |
| A20      | I think that the indoor environment should be ventilated frequently in order not to get COVID-19 disease.                   | 1 <input type="checkbox"/> | 2 <input type="checkbox"/> | 3 <input type="checkbox"/> |
| A21      | COVID-19 disease can cause more severe illness in smokers.                                                                  | 1 <input type="checkbox"/> | 2 <input type="checkbox"/> | 3 <input type="checkbox"/> |
| A22      | Fans, air conditioners, hand-hair dryers can be important factors in the spread of COVID-19 disease in indoor environments. | 1 <input type="checkbox"/> | 2 <input type="checkbox"/> | 3 <input type="checkbox"/> |
| A23      | I do not believe that COVID-19 disease kills people without health problems.                                                | 1 <input type="checkbox"/> | 2 <input type="checkbox"/> | 3 <input type="checkbox"/> |
| A24      | There is an excessive use of unnecessary disinfectants in society.                                                          | 1 <input type="checkbox"/> | 2 <input type="checkbox"/> | 3 <input type="checkbox"/> |
| A25      | I think the people around me are not taking the COVID-19 measures seriously enough.                                         | 1 <input type="checkbox"/> | 2 <input type="checkbox"/> | 3 <input type="checkbox"/> |

| Question   | COVID 19 Behavior                                                                                                         | Never                      | Sometimes                  | Often                      | Always                     |
|------------|---------------------------------------------------------------------------------------------------------------------------|----------------------------|----------------------------|----------------------------|----------------------------|
| <b>B1</b>  | I try to cover my mouth when I cough and sneeze.                                                                          | 1 <input type="checkbox"/> | 2 <input type="checkbox"/> | 3 <input type="checkbox"/> | 4 <input type="checkbox"/> |
| <b>B2</b>  | I keep a distance of at least 3-4 steps from people who show common cold symptoms.                                        | 1 <input type="checkbox"/> | 2 <input type="checkbox"/> | 3 <input type="checkbox"/> | 4 <input type="checkbox"/> |
| <b>B3</b>  | To protect myself from COVID-19 infection, I wear a mask when I go out.                                                   | 1 <input type="checkbox"/> | 2 <input type="checkbox"/> | 3 <input type="checkbox"/> | 4 <input type="checkbox"/> |
| <b>B4</b>  | I use the mask to cover my mouth and nose.                                                                                | 1 <input type="checkbox"/> | 2 <input type="checkbox"/> | 3 <input type="checkbox"/> | 4 <input type="checkbox"/> |
| <b>B5</b>  | I wash my hands with soap and water, especially after touching surfaces that others have touched.                         | 1 <input type="checkbox"/> | 2 <input type="checkbox"/> | 3 <input type="checkbox"/> | 4 <input type="checkbox"/> |
| <b>B6</b>  | In the absence of water and soap, I use alcohol-containing hand antiseptic or cologne.                                    | 1 <input type="checkbox"/> | 2 <input type="checkbox"/> | 3 <input type="checkbox"/> | 4 <input type="checkbox"/> |
| <b>B7</b>  | I do not touch the inside and outside of the mask while using it.                                                         | 1 <input type="checkbox"/> | 2 <input type="checkbox"/> | 3 <input type="checkbox"/> | 4 <input type="checkbox"/> |
| <b>B8</b>  | I wear a mask in public transport vehicles.                                                                               | 1 <input type="checkbox"/> | 2 <input type="checkbox"/> | 3 <input type="checkbox"/> | 4 <input type="checkbox"/> |
| <b>B9</b>  | I take a break from visiting family and friends when illness is common.                                                   | 1 <input type="checkbox"/> | 2 <input type="checkbox"/> | 3 <input type="checkbox"/> | 4 <input type="checkbox"/> |
| <b>B10</b> | I act in accordance with social distance in the working and resting environment.                                          | 1 <input type="checkbox"/> | 2 <input type="checkbox"/> | 3 <input type="checkbox"/> | 4 <input type="checkbox"/> |
| <b>B11</b> | I act in accordance with social distance in places where people eat collectively.                                         | 1 <input type="checkbox"/> | 2 <input type="checkbox"/> | 3 <input type="checkbox"/> | 4 <input type="checkbox"/> |
| <b>B12</b> | I act in accordance with social distance in public transport vehicles.                                                    | 1 <input type="checkbox"/> | 2 <input type="checkbox"/> | 3 <input type="checkbox"/> | 4 <input type="checkbox"/> |
| <b>B13</b> | I wear a mask when I go out of the house when the disease is common.                                                      | 1 <input type="checkbox"/> | 2 <input type="checkbox"/> | 3 <input type="checkbox"/> | 4 <input type="checkbox"/> |
| <b>B14</b> | When the disease is common, when I come home from outside, I wash my hands with soap and water first.                     | 1 <input type="checkbox"/> | 2 <input type="checkbox"/> | 3 <input type="checkbox"/> | 4 <input type="checkbox"/> |
| <b>B15</b> | When the disease is widespread, I keep the shopping materials I brought home from outside for a while, then I process it. | 1 <input type="checkbox"/> | 2 <input type="checkbox"/> | 3 <input type="checkbox"/> | 4 <input type="checkbox"/> |
| <b>B16</b> | When the disease is common, I do not leave the house unless it is absolutely necessary.                                   | 1 <input type="checkbox"/> | 2 <input type="checkbox"/> | 3 <input type="checkbox"/> | 4 <input type="checkbox"/> |
| <b>B17</b> | When illness is common, I try not to be in enclosed spaces where other people are present.                                | 1 <input type="checkbox"/> | 2 <input type="checkbox"/> | 3 <input type="checkbox"/> | 4 <input type="checkbox"/> |
| <b>B18</b> | I pay attention to how other people act outside.                                                                          | 1 <input type="checkbox"/> | 2 <input type="checkbox"/> | 3 <input type="checkbox"/> | 4 <input type="checkbox"/> |
| <b>B19</b> | I pay attention to the social distance between me and other people when the disease is common.                            | 1 <input type="checkbox"/> | 2 <input type="checkbox"/> | 3 <input type="checkbox"/> | 4 <input type="checkbox"/> |
| <b>B20</b> | I am making a special effort to avoid contracting COVID-19.                                                               | 1 <input type="checkbox"/> | 2 <input type="checkbox"/> | 3 <input type="checkbox"/> | 4 <input type="checkbox"/> |

**Supplementary File S2. CKAPS.**

| <b>Knowledge-Contagion Dimension</b>                                                                                                                         | <b>Disagree</b>            | <b>Partly agree</b>        | <b>Totally agree</b>       |
|--------------------------------------------------------------------------------------------------------------------------------------------------------------|----------------------------|----------------------------|----------------------------|
| KC1- COVID-19 disease is transmitted by droplets in the coughs of patients <sub>(K01)</sub> .                                                                | 1 <input type="checkbox"/> | 2 <input type="checkbox"/> | 3 <input type="checkbox"/> |
| KC2- COVID-19 is more severe in the elderly and those with chronic diseases <sub>(K02)</sub> .                                                               | 1 <input type="checkbox"/> | 2 <input type="checkbox"/> | 3 <input type="checkbox"/> |
| KC3- The most common symptoms of COVID-19 disease are fever, cough and respiratory distress <sub>(K03)</sub> .                                               | 1 <input type="checkbox"/> | 2 <input type="checkbox"/> | 3 <input type="checkbox"/> |
| <b>Knowledge -Protection Dimension</b>                                                                                                                       |                            |                            |                            |
| KP1- Mask should be worn to protect from COVID-19 disease <sub>(K05)</sub> .                                                                                 | 1 <input type="checkbox"/> | 2 <input type="checkbox"/> | 3 <input type="checkbox"/> |
| KP2- Hands should be washed with soap and water to protect from the virus <sub>(K06)</sub> .                                                                 | 1 <input type="checkbox"/> | 2 <input type="checkbox"/> | 3 <input type="checkbox"/> |
| KP3- In the absence of water and soap, alcohol-containing disinfectant or cologne should be used <sub>(K07)</sub> .                                          | 1 <input type="checkbox"/> | 2 <input type="checkbox"/> | 3 <input type="checkbox"/> |
| KP4- Contact of contaminated hands with eyes, mouth and nose may cause disease <sub>(K08)</sub> .                                                            | 1 <input type="checkbox"/> | 2 <input type="checkbox"/> | 3 <input type="checkbox"/> |
| KP5- Everyone who comes together to protect from disease must wear a mask <sub>(K09)</sub> .                                                                 | 1 <input type="checkbox"/> | 2 <input type="checkbox"/> | 3 <input type="checkbox"/> |
| KP6- Distance, hygiene and mask wearing rules should be followed among employees in order to protect themselves from disease in workplace <sub>(K18)</sub> . | 1 <input type="checkbox"/> | 2 <input type="checkbox"/> | 3 <input type="checkbox"/> |
| KP7- The mask should be changed when it becomes damp or soiled <sub>(K26)</sub> .                                                                            | 1 <input type="checkbox"/> | 2 <input type="checkbox"/> | 3 <input type="checkbox"/> |
| <b>Attitude-Susceptibility Dimension</b>                                                                                                                     |                            |                            |                            |
| ASus1- I do not believe that COVID-19 disease is transmitted by the scattering of droplets in the inhaled air <sub>(A09)</sub> .                             | 1 <input type="checkbox"/> | 2 <input type="checkbox"/> | 3 <input type="checkbox"/> |
| ASus2- I do not believe that COVID-19 is transmitted by those who have had the disease asymptotically <sub>(A10)</sub> .                                     | 1 <input type="checkbox"/> | 2 <input type="checkbox"/> | 3 <input type="checkbox"/> |
| ASus3- I do not believe that wearing a mask protects people from COVID 19 disease <sub>(A11)</sub> .                                                         | 1 <input type="checkbox"/> | 2 <input type="checkbox"/> | 3 <input type="checkbox"/> |
| ASus4- I don't think it is necessary to wash hands with soap and water to protect from COVID 19 disease <sub>(A12)</sub> .                                   | 1 <input type="checkbox"/> | 2 <input type="checkbox"/> | 3 <input type="checkbox"/> |
| <b>Attitude-Severity Dimension</b>                                                                                                                           |                            |                            |                            |
| Ase1- COVID-19 is not easily transmitted to me <sub>(A04)</sub> .                                                                                            | 1 <input type="checkbox"/> | 2 <input type="checkbox"/> | 3 <input type="checkbox"/> |
| Ase2- COVID-19 is not that deadly disease is in my opinion <sub>(A06)</sub> .                                                                                | 1 <input type="checkbox"/> | 2 <input type="checkbox"/> | 3 <input type="checkbox"/> |
| Ase3- Even if I get COVID-19, I'll get over it easily <sub>(A07)</sub> .                                                                                     | 1 <input type="checkbox"/> | 2 <input type="checkbox"/> | 3 <input type="checkbox"/> |
| Ase4- think my body resistance to COVID-19 disease is quite high <sub>(A08)</sub> .                                                                          | 1 <input type="checkbox"/> | 2 <input type="checkbox"/> | 3 <input type="checkbox"/> |
| <b>Attitude-Benefit Dimension</b>                                                                                                                            |                            |                            |                            |
| ABen1- Wearing gloves protects me from disease <sub>(A02)</sub> .                                                                                            | 1 <input type="checkbox"/> | 2 <input type="checkbox"/> | 3 <input type="checkbox"/> |
| ABen2- I won't get sick if I wear a mask outside <sub>(A03)</sub> .                                                                                          | 1 <input type="checkbox"/> | 2 <input type="checkbox"/> | 3 <input type="checkbox"/> |
| <b>Attitude-Barrier Dimension</b>                                                                                                                            |                            |                            |                            |
| ABar1- Social distance does not matter to me in COVID-19 disease <sub>(A14)</sub> .                                                                          | 1 <input type="checkbox"/> | 2 <input type="checkbox"/> | 3 <input type="checkbox"/> |
| ABar2- Only the elderly and chronic patients should be protected in the community for COVID-19 disease <sub>(T16)</sub> .                                    | 1 <input type="checkbox"/> | 2 <input type="checkbox"/> | 3 <input type="checkbox"/> |
| ABar3- Only sick people to wear mask is enough <sub>(T17)</sub> .                                                                                            | 1 <input type="checkbox"/> | 2 <input type="checkbox"/> | 3 <input type="checkbox"/> |

| <b>Behavior-SeekingHealth Behavior Dimension</b>                                                                             | <b>Never</b>               | <b>Sometimes</b>           | <b>Often</b>               | <b>Always</b>              |
|------------------------------------------------------------------------------------------------------------------------------|----------------------------|----------------------------|----------------------------|----------------------------|
| BS1- I try to cover my mouth when I cough and sneeze <sub>(B01)</sub> .                                                      | 1 <input type="checkbox"/> | 2 <input type="checkbox"/> | 3 <input type="checkbox"/> | 4 <input type="checkbox"/> |
| BS2- To protect myself from COVID 19 infection, I wear a mask when I go out <sub>(B03)</sub> .                               | 1 <input type="checkbox"/> | 2 <input type="checkbox"/> | 3 <input type="checkbox"/> | 4 <input type="checkbox"/> |
| BS3- I use the mask to cover my mouth and nose <sub>(B04)</sub> .                                                            | 1 <input type="checkbox"/> | 2 <input type="checkbox"/> | 3 <input type="checkbox"/> | 4 <input type="checkbox"/> |
| BS4- In the absence of water and soap, I use alcohol-containing hand antiseptic or cologne <sub>(B06)</sub> .                | 1 <input type="checkbox"/> | 2 <input type="checkbox"/> | 3 <input type="checkbox"/> | 4 <input type="checkbox"/> |
| BS5- I wear a mask in public transport vehicles <sub>(B08)</sub> .                                                           | 1 <input type="checkbox"/> | 2 <input type="checkbox"/> | 3 <input type="checkbox"/> | 4 <input type="checkbox"/> |
| BS6- When the disease is common, when I come home from outside, I wash my hands with soap and water first <sub>(B14)</sub> . | 1 <input type="checkbox"/> | 2 <input type="checkbox"/> | 3 <input type="checkbox"/> | 4 <input type="checkbox"/> |
| <b>Behavior-Avoidance Illness Dimension</b>                                                                                  |                            |                            |                            |                            |
| BA1- I take a break from visiting family and friends when illness is common <sub>(B09)</sub> .                               | 1 <input type="checkbox"/> | 2 <input type="checkbox"/> | 3 <input type="checkbox"/> | 4 <input type="checkbox"/> |
| BA2- I act in accordance with social distance in the working and resting environment <sub>(B10)</sub> .                      | 1 <input type="checkbox"/> | 2 <input type="checkbox"/> | 3 <input type="checkbox"/> | 4 <input type="checkbox"/> |
| BA3- In public transport, I act in accordance with social distancing <sub>(B12)</sub> .                                      | 1 <input type="checkbox"/> | 2 <input type="checkbox"/> | 3 <input type="checkbox"/> | 4 <input type="checkbox"/> |
| BA4- When illness is common, I try not to be in enclosed spaces where other people are present <sub>(B17)</sub> .            | 1 <input type="checkbox"/> | 2 <input type="checkbox"/> | 3 <input type="checkbox"/> | 4 <input type="checkbox"/> |
| BA5- I pay attention to how other people act outside <sub>(B18)</sub> .                                                      | 1 <input type="checkbox"/> | 2 <input type="checkbox"/> | 3 <input type="checkbox"/> | 4 <input type="checkbox"/> |
| BA6- I pay attention to the social distance between me and other people when the disease is common <sub>(B19)</sub> .        | 1 <input type="checkbox"/> | 2 <input type="checkbox"/> | 3 <input type="checkbox"/> | 4 <input type="checkbox"/> |
